# Supplementary material
Source: ML conference proceedings conference paper supplement (https://aclanthology.org/2026.semeval-1.130)

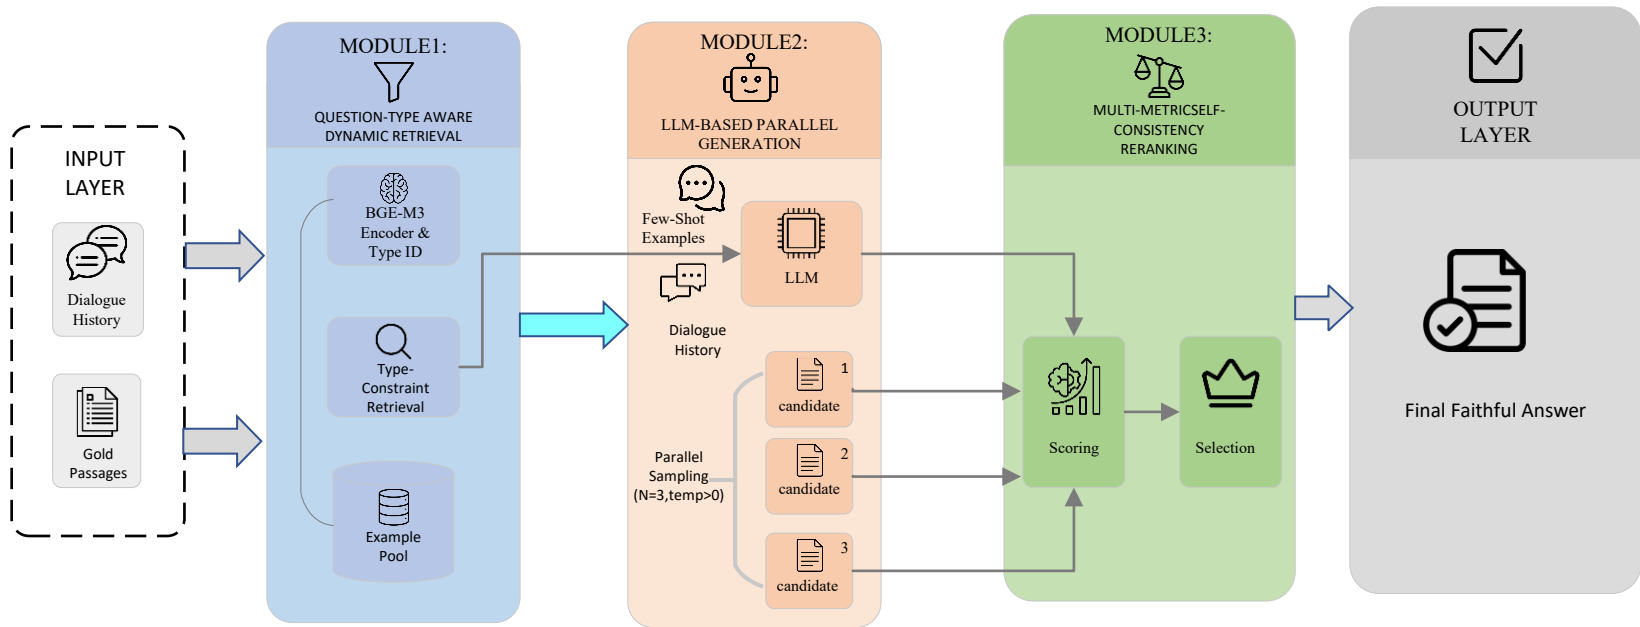

Supplement: SupplementaryMaterial [file Structure.pdf › Structure.pdf]

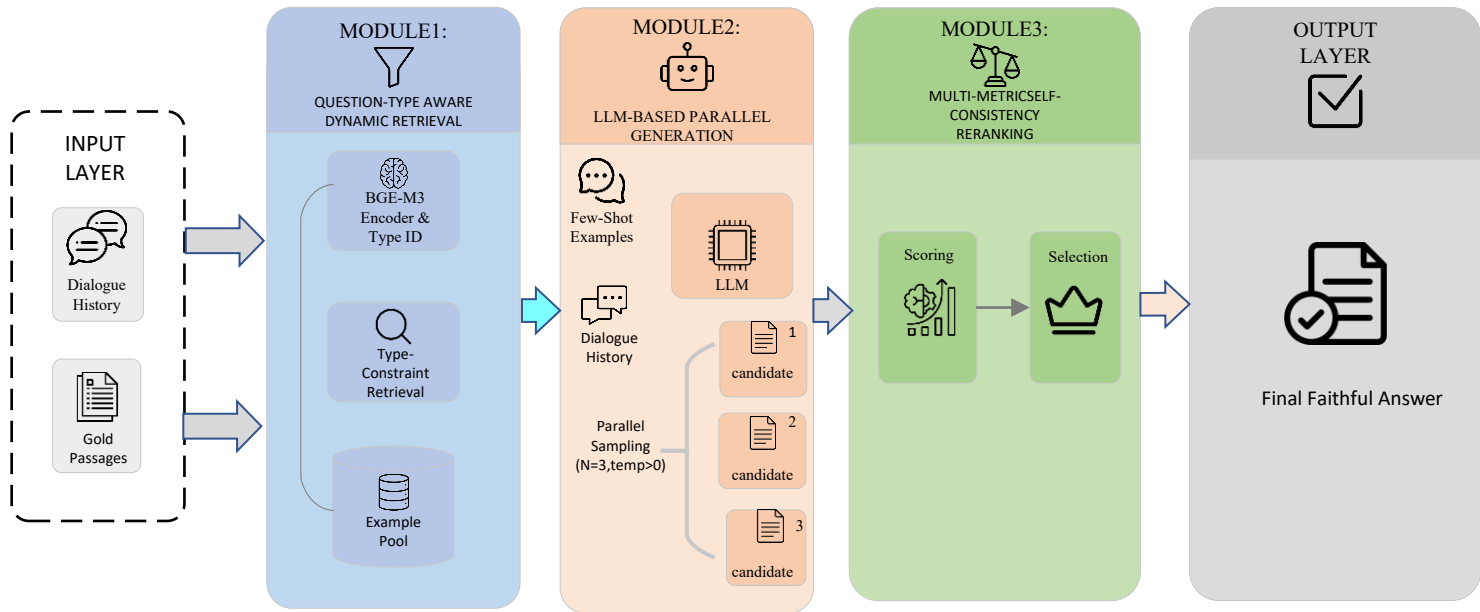

Supplement: SupplementaryMaterial [file Structure1.pdf › Structure1.pdf]
